# Supplementary material for: The miR-125 family is an important regulator of the expression and maintenance of maternal effect genes during preimplantational embryo development
Source: PubMed Central journal article supplement (PMC5133438; doi:10.1098/rsob.160181), 2016-11-30
Supplement: rsob160181supp1.pdf [file rsob160181supp1.pdf]

## **Supplementary materials**

**The miR-125 family is an important regulator of the expression and maintenance of maternal effect genes during preimplantational embryo development**

Kyeoung-Hwa Kim<sup>1</sup>, You-Mi Seo<sup>2</sup>, Eun-Young Kim<sup>1</sup>, Su-Yeon Lee<sup>1</sup>,

Jini Kwon<sup>1</sup>, Jung-Jae Ko<sup>1,\*</sup> and Kyung-Ah Lee<sup>1,\*</sup>

<sup>1</sup>Institute of Reproductive Medicine, Department of Biomedical Science, College of Life Science, CHA University, Pango, Korea. <sup>2</sup>Department of Oral Histology-Developmental Biology, School of Dentistry and Dental Research Institute, Seoul National University, Seoul, Korea.

### **Contact Information**

\*Correspondence and requests for materials should be addressed to J.J.K. (email: highko@cha.ac.kr) or K.A.L. (email: leeka@cha.ac.kr).

**Running head:** miR-125 family regulates MEG expression

**Keywords:** Sebox, Lin28a, miR-125 family, Translational regulation, Bioinformatics

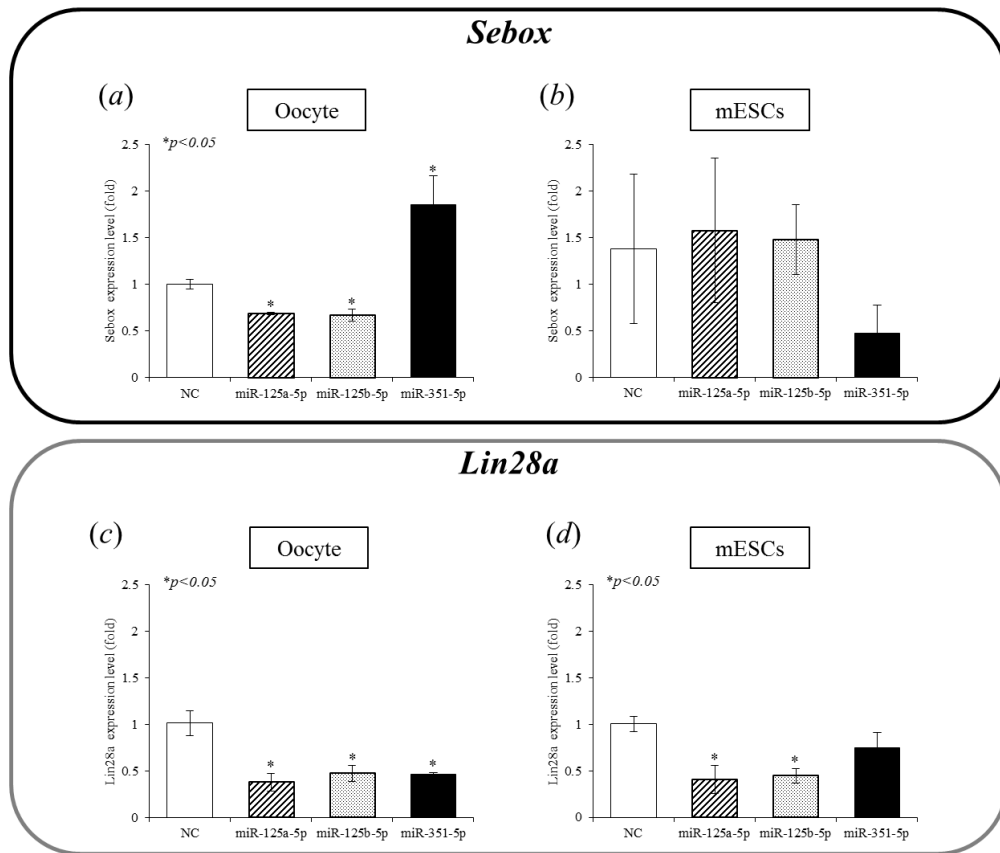

**Supplementary Figure 1.** Endogenous *Sebox* and *Lin28a* transcript levels were differentially regulated by different mimics in different cell types, including oocytes and mESC. The endogenous *Sebox* transcript level was measured by quantitative real-time RT-PCR after oocytes (a) and mESCs (b) were treated with mimics of each miR-125 family member. The endogenous *Lin28a* transcript level was measured after oocytes (c) and mESCs (d) were treated with mimics of each miR-125 family member. NC, treatment with negative control mimic. \* $p < 0.05$  compared with the negative control mimic-transfected or negative control mimic-microinjected group.

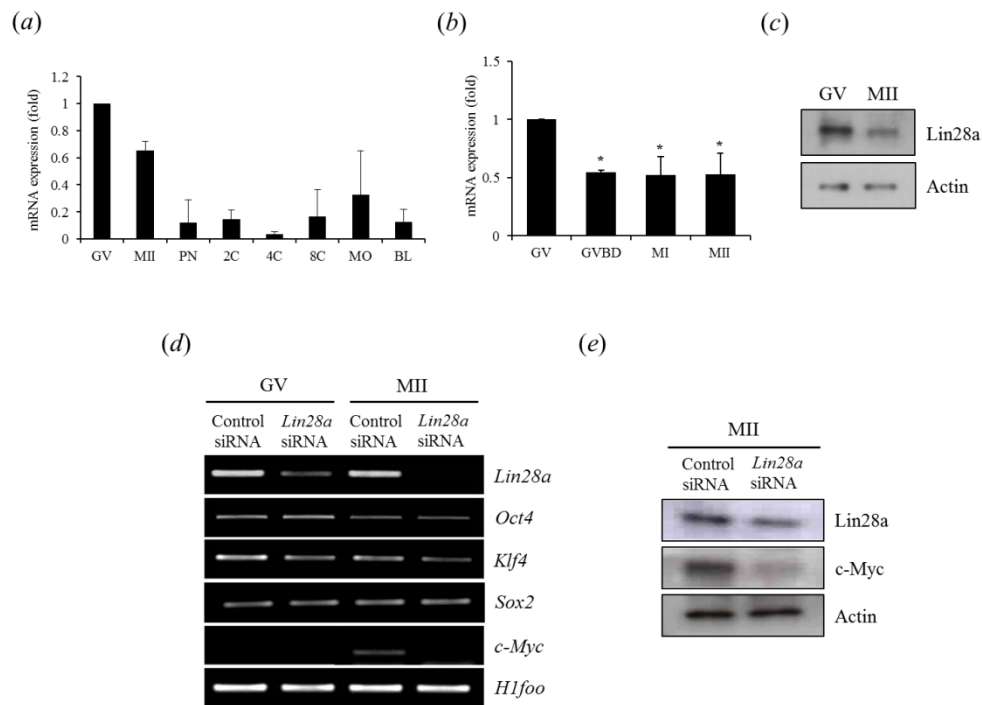

**Supplementary Figure 2.** Downregulation of c-Myc by *Lin28a* siRNA. (a) The expression pattern of *Lin28a* during early embryogenesis. The relative gene expression of *Lin28a* in a single oocyte or embryo throughout development was determined by quantitative real-time RT-PCR. Synthetic GFP RNA was used as an internal control for normalization. The results are expressed as the mean $\pm$ SEM of at least three experiments. GV, germinal vesicle; MII, metaphase II; PN, pronuclear stage; 2C, 2-cell stage; 4C, 4-cell stage; MO, morula stage; BL, blastocyst stage. (b) Expression of *Lin28a* transcript in mouse oocytes. *Lin28a* mRNA levels during oocyte maturation were determined by quantitative real-time RT-PCR. \* $p < 0.05$  compared with GV oocytes. (c) Expression of *Lin28a* protein in mouse oocytes, as determined by Western blot analysis. The experiment was conducted three times, with 100 oocytes per lane. The blots were reprobbed with an Actin antibody as a loading control. (d) *Lin28a* RNAi suppressed *Lin28a* and *c-Myc* mRNA levels but did not affect the expression of other reprogramming factors (*Oct4*, *Sox2*, and *Klf4*) in *Lin28a*-silenced oocytes. *H1foo* was used as an internal control. (e) *Lin28a* RNAi disrupts *Lin28a* and c-Myc protein expression, as confirmed by Western blot analysis. The lysates of 200 MII oocytes injected with control siRNA or *Lin28a* siRNA were separated by SDS-PAGE. Proteins were visualized using specific antibodies against *Lin28a*, c-Myc and Actin (loading control).

**Supplementary Table 1.** miR-125 family prediction score for Sebox and Lin28a using each computational algorithm.

| Gene   | miRNAs      | Algorithm                                 |                                     |                                    |
|--------|-------------|-------------------------------------------|-------------------------------------|------------------------------------|
|        |             | TargetScan<br>Context+ score <sup>a</sup> | miRanda<br>mirSVRscore <sup>b</sup> | miRmap<br>miRmapscore <sup>c</sup> |
| Sebox  | miR-125a-5p | -0.37                                     | -0.1229                             | 84.41                              |
|        | miR-125b-5p | -0.35                                     | -0.1205                             | 88.10                              |
|        | miR-351-5p  | -0.33                                     | -0.1340                             | 84.85                              |
| Lin28a | miR-125a-5p | -0.28                                     | -0.6884                             | 89.78                              |
|        | miR-125b-5p | -0.28                                     | -0.6847                             | 89.30                              |
|        | miR-351-5p  | -0.29                                     | -0.6847                             | 91.25                              |

The more negative the value of the context+ score<sup>a</sup> from TargetScan and the mirSVRscore<sup>b</sup> from miRanda, the more favorable and higher the probability of mRNA binding.

<sup>c</sup>The miRmap score ranges from 0 to 100, where 0 represents no complementarity and 100 represents complete complementary.

**Supplementary Table 2.** List of the MEGs identified as predicted targets of the miR-125 family via dry lab methods (i.e., using three computational algorithms: miRanda, TargetScan, and miRmap). Among the list of MEGs whose depletion has been reported to lead to embryonic arrest at the 2C stage, only *Filia* and *Nlrp5* appear to be unlikely targets of miR-125 family members; the rest of the MEGs were predicted as tentative targets of at least one of the miR-125 family members.

| Gene           | Computational algorithm |             |             |
|----------------|-------------------------|-------------|-------------|
|                | miRanda                 | TargetScan  | miRmap      |
| <i>Filia</i>   | -                       | -           | -           |
| <i>Nlrp5</i>   | -                       | -           | -           |
| <i>Bnc1</i>    | -                       | miR-125b-3p | miR-125b-3p |
| <i>Lin28a</i>  | miR-125a-5p             | miR-125a-5p | miR-125a-5p |
|                | miR-125b-5p             | miR-125b-5p | miR-125b-5p |
|                | miR-351                 | miR-125b-3p | miR-351-5p  |
|                |                         | miR-351-5p  |             |
| <i>Ooep</i>    | -                       | miR-125a-3p | miR-125a-3p |
| <i>Sebox</i>   | miR-125a-5p             | miR-125a-5p | miR-125a-5p |
|                | miR-125b-5p             | miR-125b-5p | miR-125b-3p |
|                | miR-351                 | miR-351-5p  | miR-125b-5p |
|                |                         |             | miR-351-5p  |
| <i>Smarca4</i> | -                       | miR-125a-3p | miR-125b-3p |
|                |                         | miR-125b-3p |             |
| <i>Trim24</i>  | -                       | miR-125a-5p | -           |
|                |                         | miR-125a-3p |             |
|                |                         | miR-125b-5p |             |
|                |                         | miR-351-5p  |             |
|                |                         | miR-351-3p  |             |
| <i>Ube2a</i>   | miR-125a-5p             | miR-351-3p  | -           |
|                | miR-125b-5p             |             |             |
|                | miR-351                 |             |             |
| <i>Zfp3612</i> | miR-125a-3p             | miR-125a-3p | miR-125a-3p |
